# Supplementary material
Source: PubMed Central journal article supplement (PMC3825806)
Supplement: NIHMS513015-supplement-01.pdf [file NIHMS513015-supplement-01.pdf]

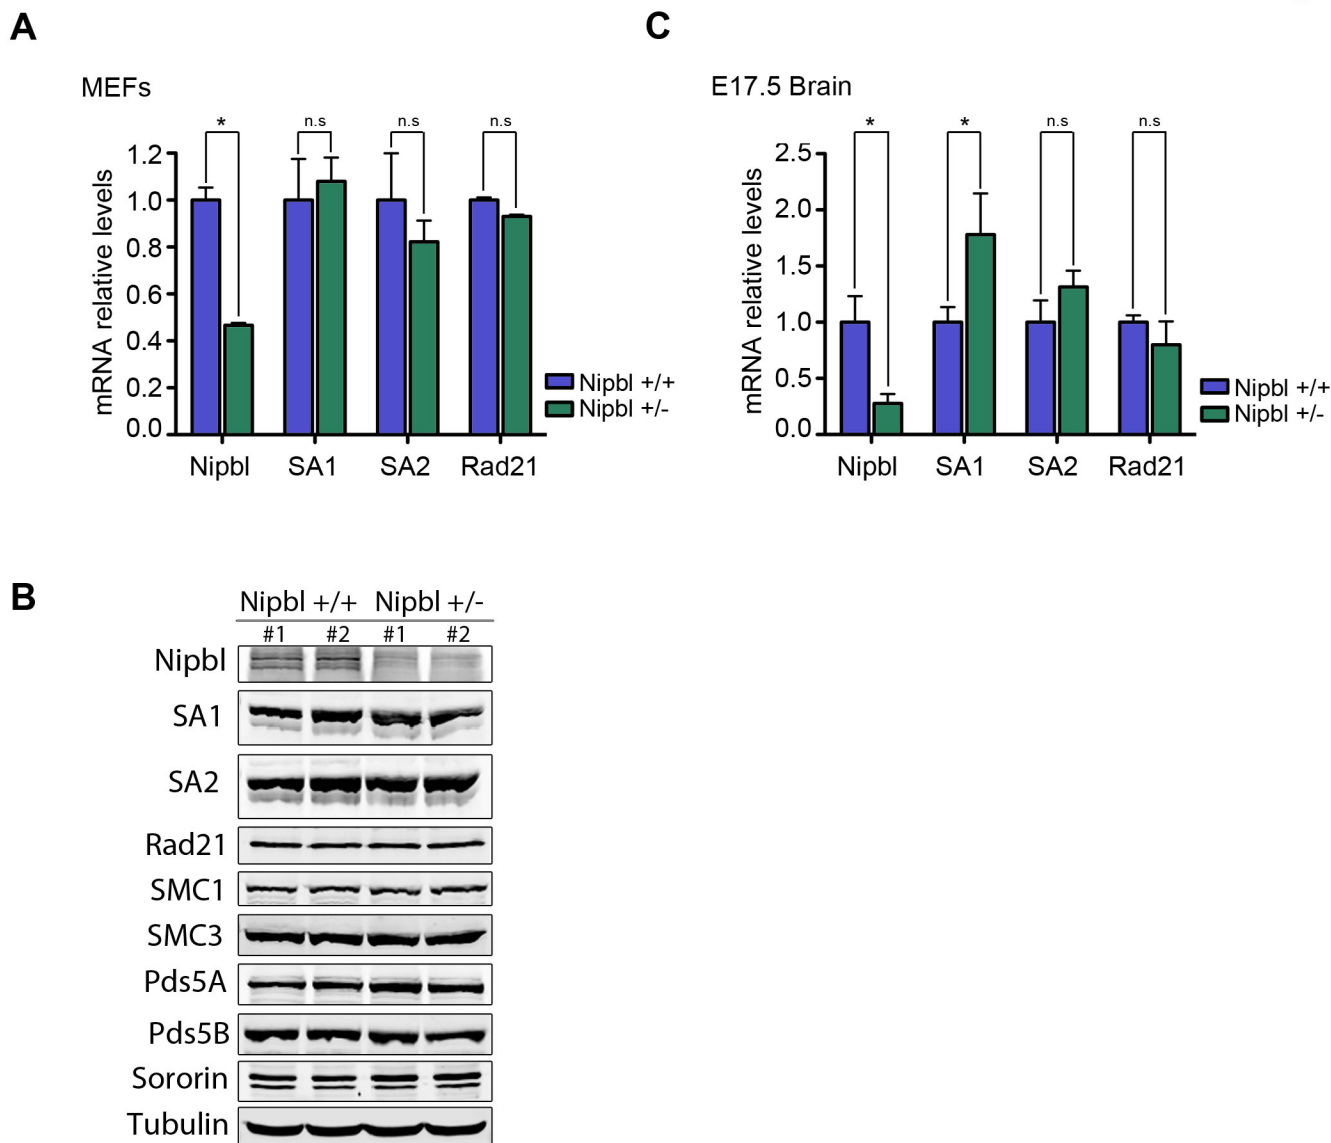

**Figure S1. Changes in mRNA and protein levels in Nipbl heterozygous MEFs and brains.**

(A) mRNA levels of Nipbl and cohesin complex subunits in Nipbl heterozygous MEFs relative to wild-type controls (2 different clones per genotype and 3 independent qPCR reactions per condition). \*  $P < 0.05$ , \*\*  $P < 0.01$ , n.s = not significant. (B) Western blot analysis of whole-cell extracts from wild-type and Nipbl +/- MEFs (2 clones each) with the indicated antibodies against cohesin subunits and its regulatory factors. Tubulin was used as loading control. (C) mRNA levels of Nipbl and cohesin subunits in brains from Nipbl heterozygous E17.5 embryos relative to the wild-type littermates (3 embryos per genotype and 3 independent qPCR reactions per condition). \*  $P < 0.05$ , \*\*  $P < 0.01$ , n.s = not significant.

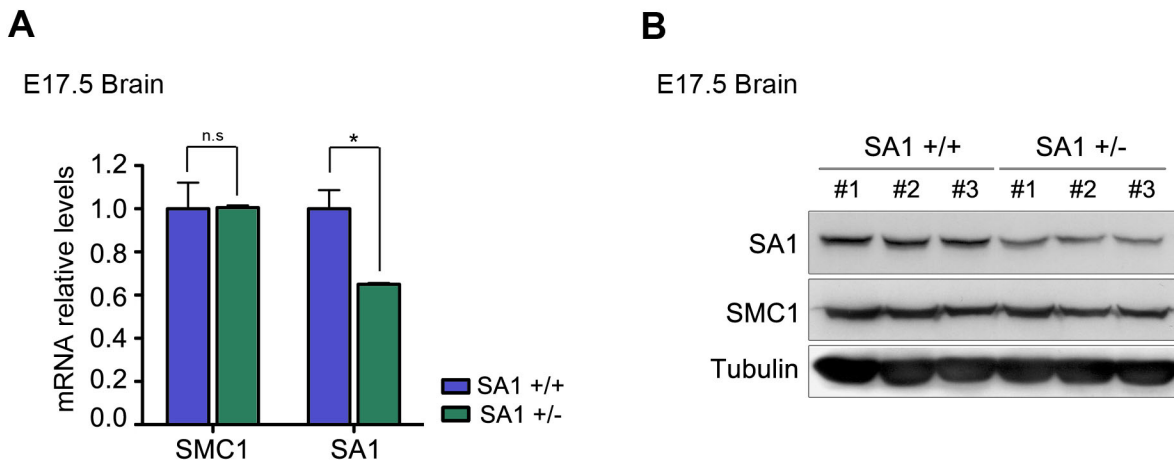

**Figure S2. Changes in mRNA and protein levels in SA1 heterozygous brains.**

(A) mRNA levels of cohesin complex subunits SMC1 and SA1 in brain tissue from SA1 heterozygous embryos relative to wild-type controls (3 embryos per genotype and 3 independent qPCR reactions per condition). \*  $P < 0.05$ , n.s = not significant. (B) Western blot analysis of whole-cell extracts from SA1+/+ and SA1+/- embryonic brain tissue (3 embryos per genotype) with the indicated antibodies. Tubulin was used as loading control.

**Supplementary Table S1: Primers used for Real Time-qPCR**

| <i>Primer</i> | <i>Sequence (5'-3')</i>  |
|---------------|--------------------------|
| Nipbl Fw      | AGTCCATATGCCCCACAGAG     |
| Nipbl Rev     | ACCGGCAACAATAGGACTTG     |
| SA1 Fw        | AGGCTTTCATGCTGCTCTGT     |
| SA1 Rev       | TCCATGCTTTGGTTTTCTC      |
| SA2 Fw        | GGGGGAGGAACTGTCTTTCT     |
| SA2 Rev       | CCTTCAATGTCTTCAAATCTGTG  |
| Rad21 Fw      | CCCATTGGGACAAGAAGCTA     |
| Rad21 Rev     | GTCTGCGAGGAGGTATTTGG     |
| Myc Fw        | TCGCCTCACTCAGCTCCCCT     |
| Myc Rev       | ACCGTCCGCTCACTCCCCTCT    |
| Pcdh7 Fw      | GACGGCTACTGCGCCTGGAT     |
| Pcdh7 Rev     | TGGGGGTGTCCACCAGGACA     |
| Pcdh17 Fw     | CCCAATAGGCTCTCGGCGCA     |
| Pcdh17 Rev    | AGCGGACTGCATCTCCGAGC     |
| Pcdh11X Fw    | CTGCGAGCTGTGGCGGTAGA     |
| Pcdh11X Rev   | TCTCCTGGGCGCCAGACTGA     |
| Pcdhb16 Fw    | AGGTCTCAGCCCTCGGAAAAGGA  |
| Pcdhb16 Rev   | GAATAGCGCCTCAGTTCCCCTGC  |
| Pcdhb17 Fw    | TGTGAAGCAAACGCCGAGGAAAGA |
| Pcdhb17 Rev   | GGAAATGATCCGAGCCCTGCGAT  |
| Pcdhb20 Fw    | GGTATTACAGGAGCTTCACCGGCA |
| Pcdhb20 Rev   | AGCACTCGCCTGAGACAATCCC   |
| Pcdhb21 Fw    | ACAAAGGTGGGGCACCCACAAG   |
| Pcdhb21 Rev   | TGGCAAGAACCGAGGACCCTTC   |
| GAPDH Fw      | TGCACCACCAACTGCTTAGC     |
| GAPDH Rev     | GAGGGGCCATCCACAGTCTTC    |

**Supplementary Table S2: Primers used for CHIP-qPCR**

| <b>Genomic Region</b>            | <b>Primers</b> | <b>Sequence (5'-3')</b>                             |
|----------------------------------|----------------|-----------------------------------------------------|
| Chr 15: 61,814,801 - 61,815,300  | <b>Myc</b>     | Fw ACAAATCCGAGAGCCACAAC<br>Rev TCGAGCTCATTGCACAATTC |
| Chr 5: 58,105,123 - 58,105,623   | <b>Pcdh7</b>   | Fw TTTGTCCCTTGGTGGAGTTC<br>Rev AGGGTCGGGAGTCTTTCATT |
| Chr 14: 84,838,181 - 84,838,727  | <b>Pcdh17</b>  | Fw TTCCCGGTGTCAATCAATTT<br>Rev TACATACTGG TCCCCCTTG |
| Chr X: 117,401,147 - 117,401,603 | <b>Pcdh11X</b> | Fw AGTCTGCTTTTGCCAGGTGT<br>Rev ACCCTGAAAATCCTCCAAGG |
| Chr 18: 37,644,356 - 37,644,924  | <b>Pcdhb17</b> | Fw GGCCAGTTTCTCACCACCTA<br>Rev GCAGTCTCCATGGCTCTTTC |
| Chr 18: 37,672,967 - 37,673,448  | <b>Pcdhb21</b> | Fw TGCAGGACAGGATGAGAGAA<br>Rev GGCAGCTCAGAGAGTGGTTC |
